# Supplementary material for: A plug-and-play modular microcapillary platform for the generation of multicompartmental double emulsions using glass or fluorocarbon capillaries
Source: Royal Society of Chemistry journal article supplement (doi:10.1039/d1lc00126d), 2021-01-01
Supplement: d1lc00126d1.pdf [file d1lc00126d1.pdf]

## A plug-and-play modular microcapillary platform for the generation of multicompartmental double emulsions using glass or fluorocarbon capillaries

Sean Farley,<sup>†</sup> Kaitlyn Ramsay<sup>†</sup> and Katherine S. Elvira<sup>\*</sup>

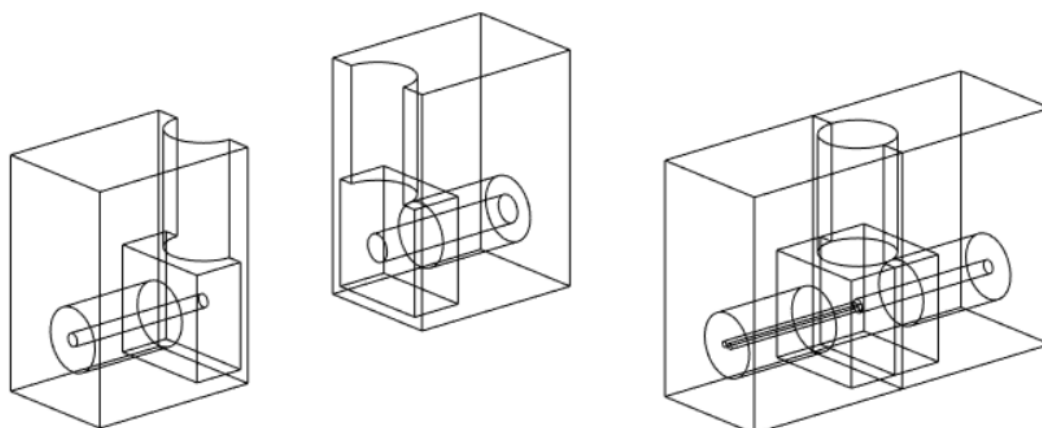

**Fig. S1. Wireframe schematic of the 3D printed mould assembly.** Two mould components (left images) are mated and held together by rubber bands (right image), and resin is injected through the hole at the top.

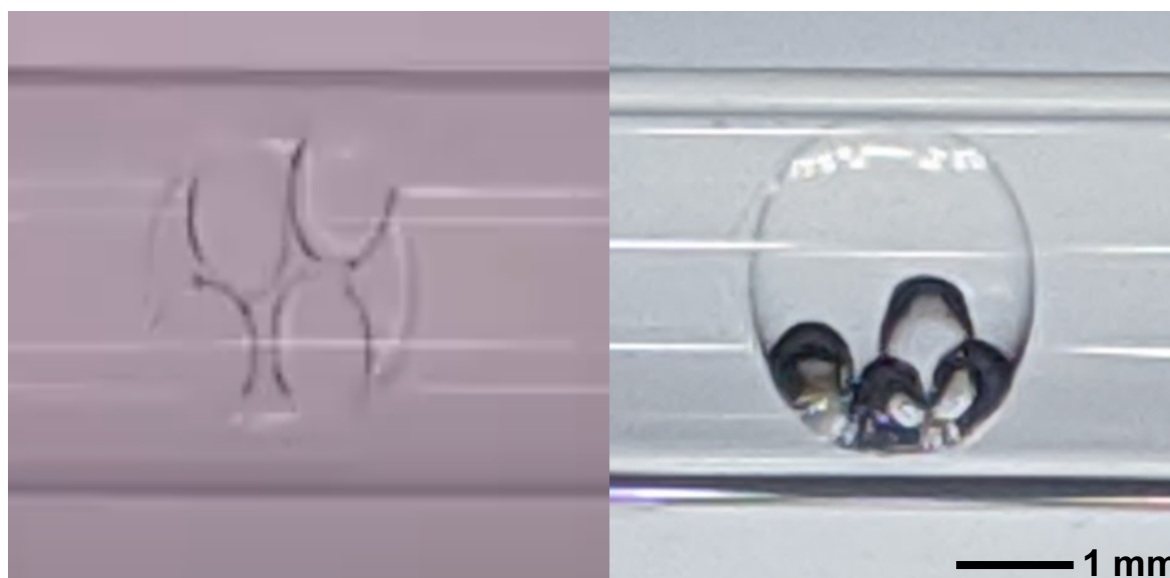

**Fig. S2. Multicompartmental double emulsion images.** Representative image of a tetra-compartmental double emulsion when taken from above with a stereomicroscope (left image). Representative image of the same tetra-compartmental double emulsion when taken from the side using a smartphone camera (right image). Images are unedited. Scale applies to both images.
